# Supplementary material
Source: PubMed Central journal article supplement (PMC5829008)
Supplement: NIHMS935345-supplement-Visual_abstract.pdf [file NIHMS935345-supplement-Visual_abstract.pdf]

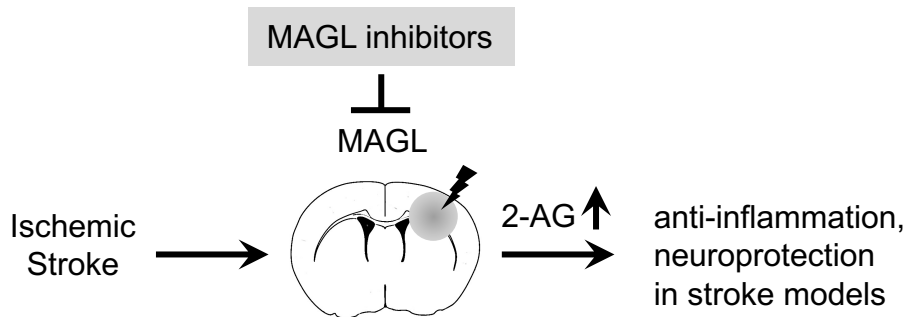

A posttreatment with MAGL inhibitors significantly reduces brain damage and improves functional outcome, indicating that MAGL may represent an important target for neuroprotection in ischemic stroke.
